# Supplementary material for: Simultaneous improvement of kinetics and thermodynamics based on SrF2 and SrF2@Gr additives on hydrogen sorption in MgH2
Source: Royal Society of Chemistry journal article supplement (doi:10.1039/d1ma00012h), 2021-01-01
Supplement: d1ma00012h1.pdf [file d1ma00012h1.pdf]

## Supplementary Information

### **Simultaneous improvement of kinetics and thermodynamics based on $\text{SrF}_2$ and $\text{SrF}_2@\text{Gr}$ additives on hydrogen sorption in $\text{MgH}_2$**

Vivek Shukla<sup>a</sup>, Ashish Bhatnagar<sup>b</sup>, Satish K Verma<sup>a</sup>, Anant P Pandey<sup>a</sup>, Alok K Vishwakarma<sup>a</sup>,  
Pankaj Srivastava<sup>c</sup>, T P Yadav<sup>a</sup>, O N Srivastava<sup>a\*</sup>

<sup>a</sup>Hydrogen Energy Centre, Department of Physics, Banaras Hindu University, Varanasi-221005, India

<sup>b</sup>Department of Physics and Materials Science and Engineering, Jaypee Institute of Information Technology, Noida, Sector-62, 201309

<sup>c</sup>Department of Chemistry, Banaras Hindu University, Varanasi -221005, India

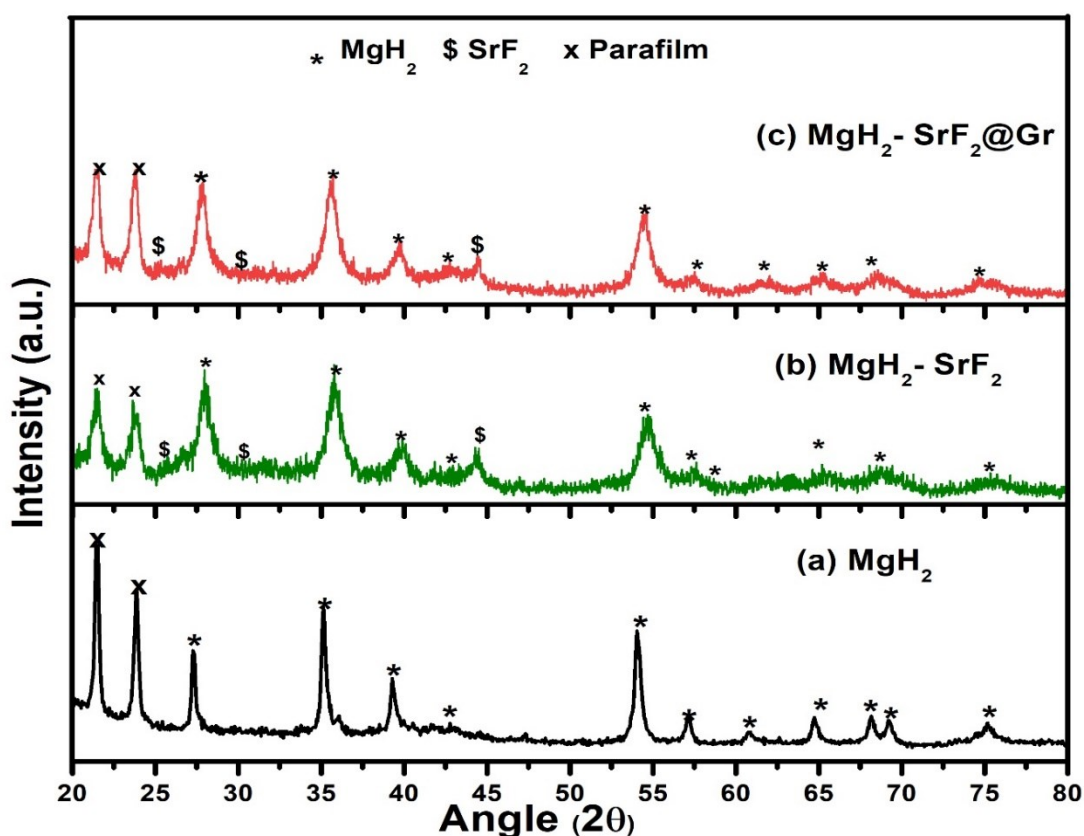

**Figure.S1** XRD of (a)  $\text{MgH}_2$  (b)  $\text{MgH}_2\text{-SrF}_2$  (c)  $\text{MgH}_2\text{-SrF}_2@\text{Gr}$ .

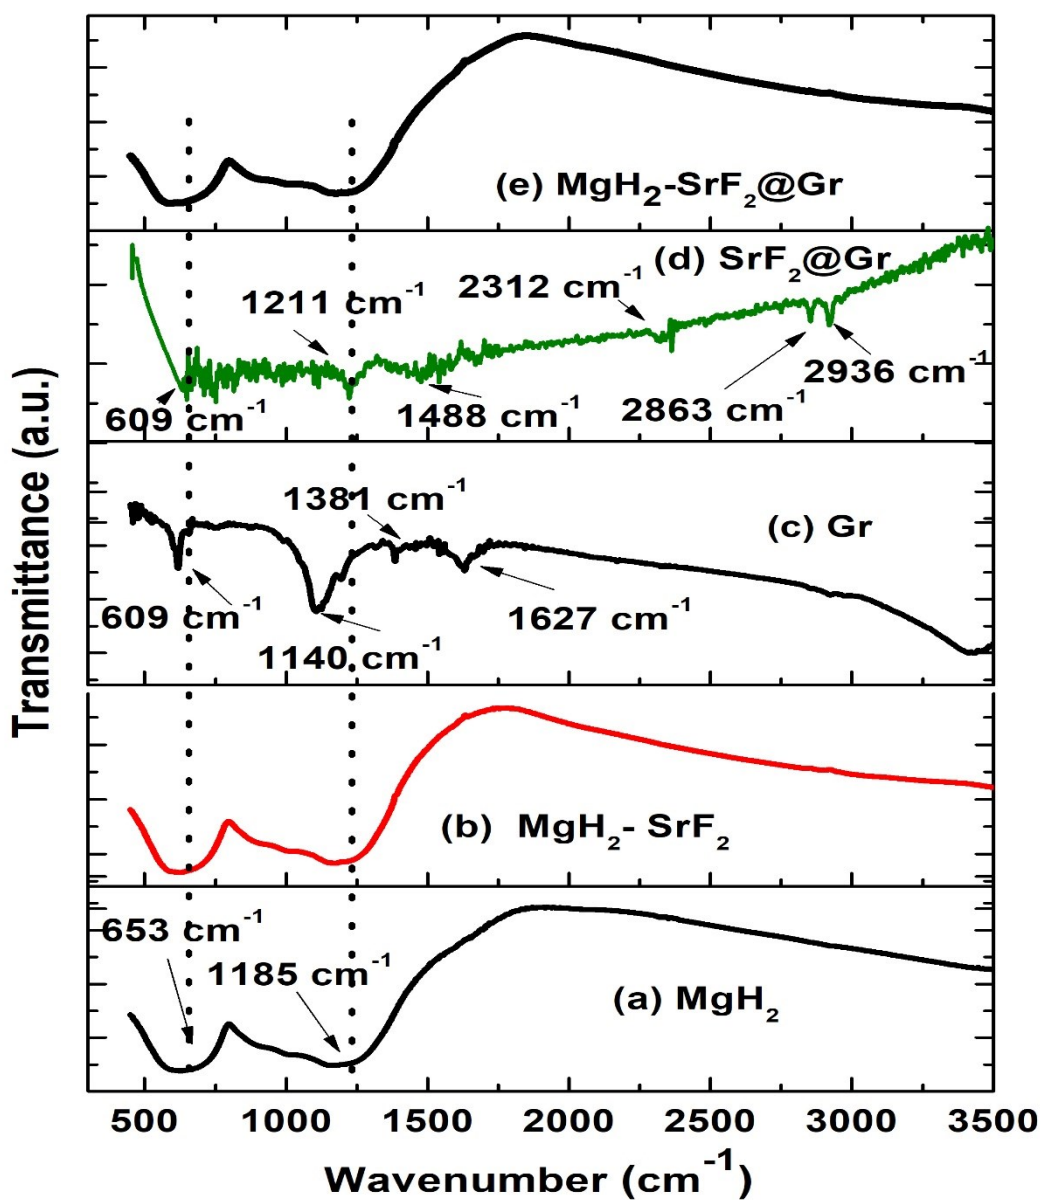

**Figure.S2** FTIR spectra of  $\text{MgH}_2$  added (a)  $\text{MgH}_2$  (b)  $\text{MgH}_2$ - $\text{SrF}_2$  (c) Gr (d)  $\text{SrF}_2$ @Gr (e)  $\text{MgH}_2$ - $\text{SrF}_2$ @Gr.

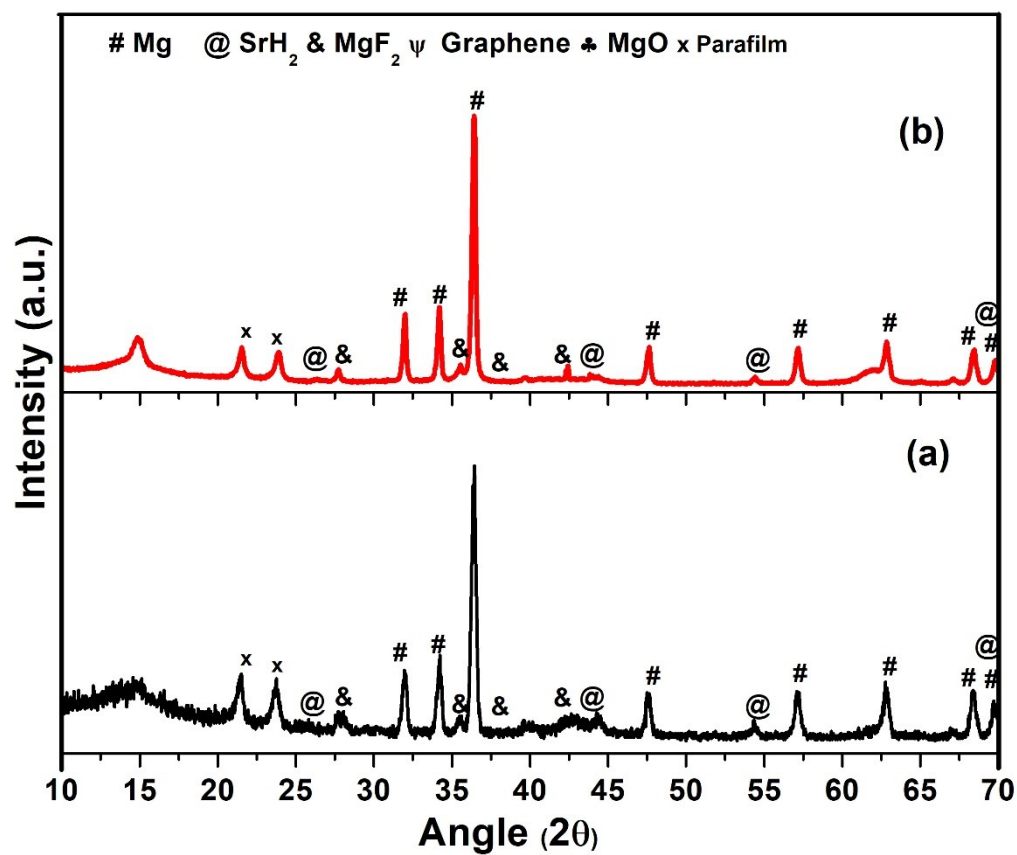

**Figure S3** XRD of (a) Mg-(MgF<sub>2</sub>+SrH<sub>2</sub>) (1<sup>st</sup> dehydrogenation) (b) Mg-SrF<sub>2</sub>@Gr (1<sup>st</sup> dehydrogenation)

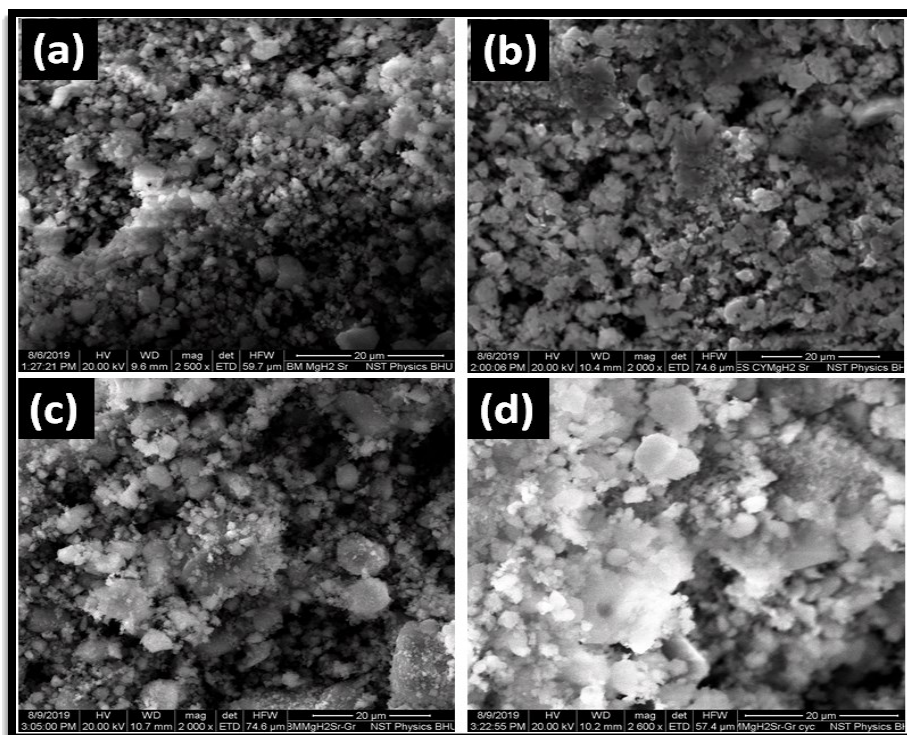

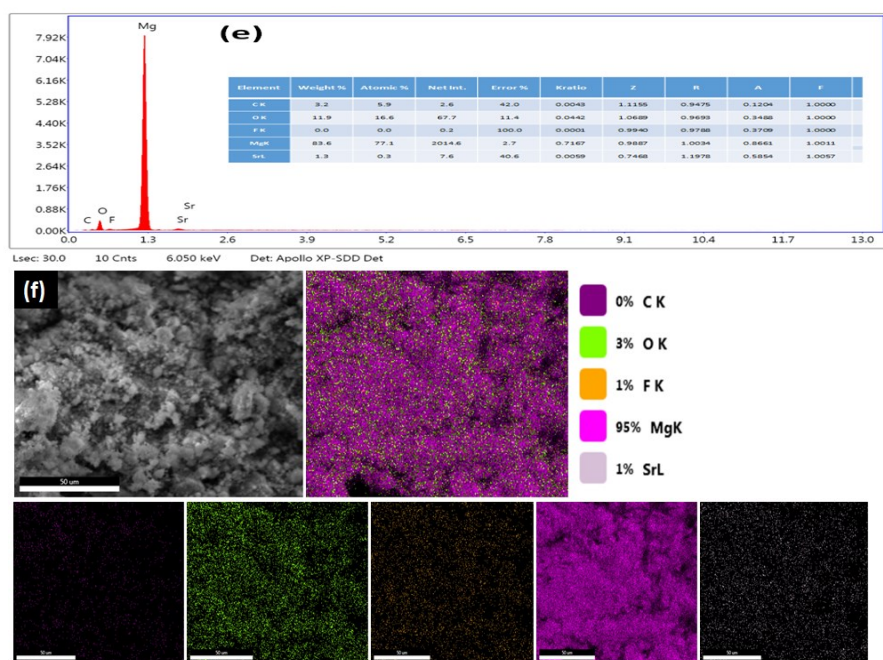

**Figure S4** Scanning electron micrographs of (a)  $\text{MgH}_2\text{-SrF}_2$  (b) 1<sup>st</sup> desorption of  $\text{MgH}_2\text{-SrF}_2$  ( $\text{Mg-(MgF}_2\text{+SrH}_2\text{)}@\text{Gr}$ ) (c)  $\text{MgH}_2\text{-SrF}_2@\text{Gr}$  (d) After cycling of  $\text{MgH}_2\text{-SrF}_2@\text{Gr}$  ( $\text{MgH}_2\text{-(MgF}_2\text{+SrH}_2\text{)}@\text{Gr}$ ) (e) EDAX spectra after cycling of  $\text{MgH}_2\text{-(MgF}_2\text{+SrH}_2\text{)}@\text{Gr}$  sample (f) Elemental mapping after cycling of  $\text{MgH}_2\text{-(MgF}_2\text{+SrH}_2\text{)}@\text{Gr}$

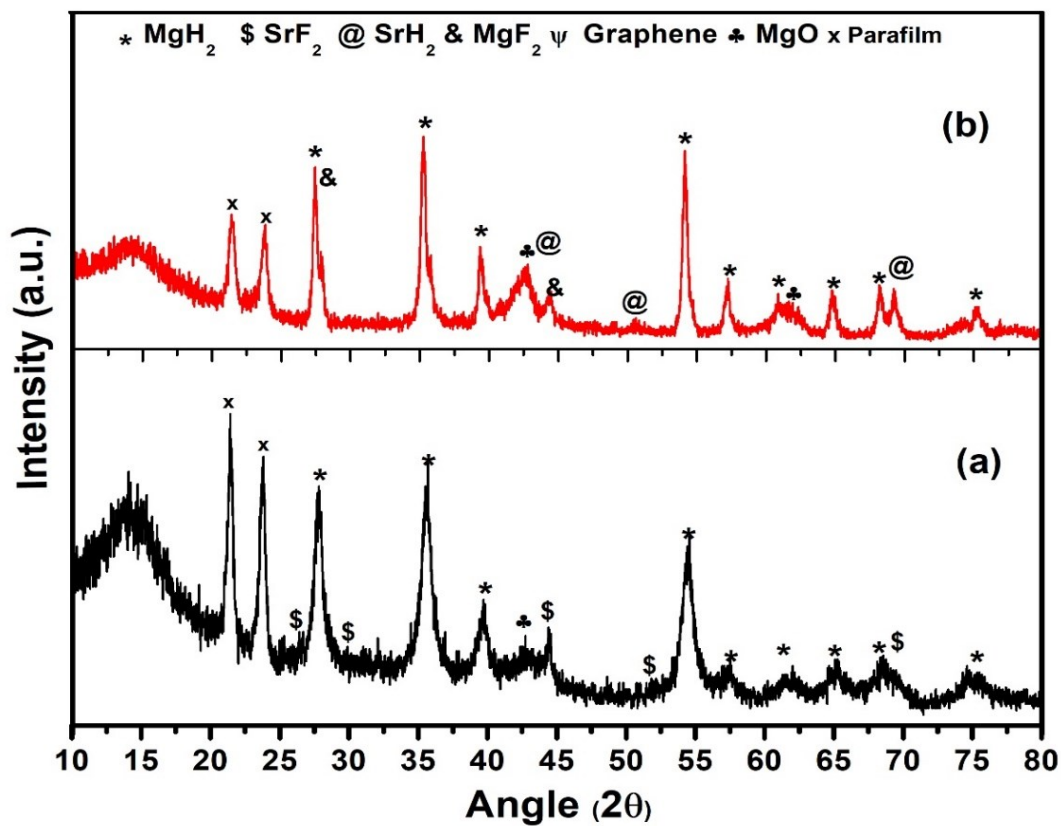

**Figure S5** XRD of (a)  $\text{MgH}_2\text{-SrF}_2\text{@Gr}$  (b) After 15<sup>th</sup> absorption of  $\text{Mg/MgH}_2\text{-(MgF}_2\text{+SrH}_2\text{)@Gr}$ .



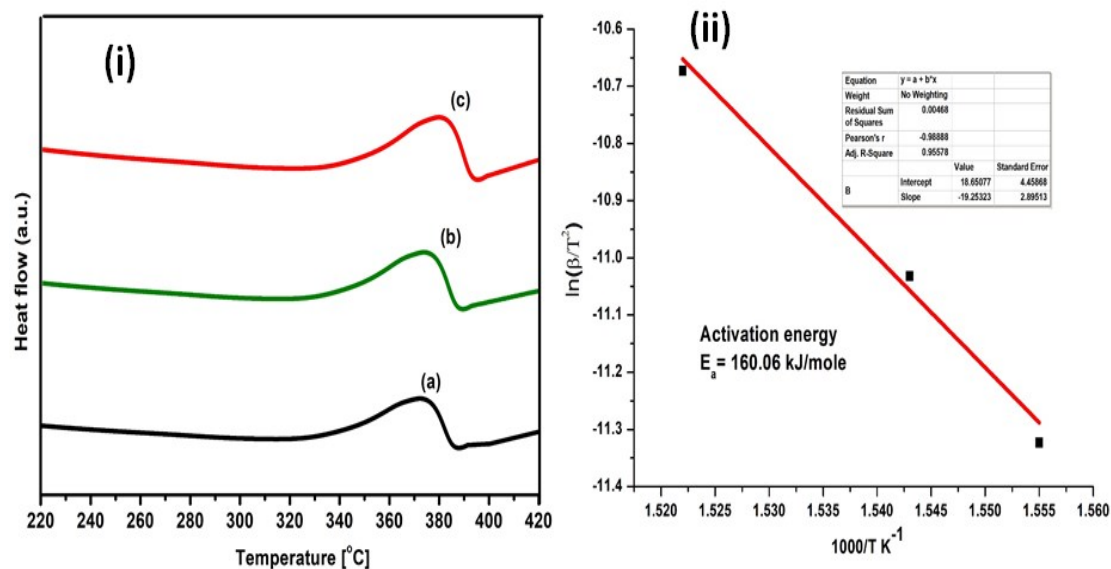

**Figure S6** DSC plot of ball milled  $\text{MgH}_2$  for 25 hrs at different heating rates (a) 5°C/min (b) 7°C/min (c) 10°C/min (ii) Kissinger plot for the calculation of activation energy.

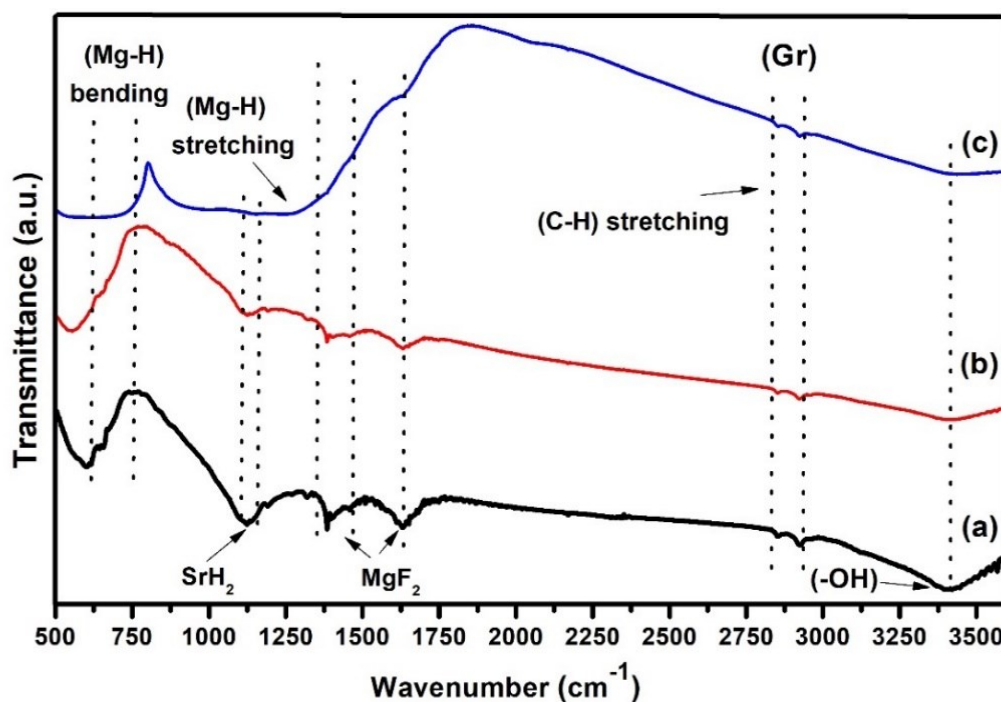

**Figure S7** FTIR of (a)  $\text{Mg-(SrH}_2\text{-MgF}_2\text{)@Gr}$  (1st dehydrogenation) (b)  $\text{Mg-(SrH}_2\text{-MgF}_2\text{)@Gr}$  (After 14 cycle of dehydrogenation) (c)  $\text{MgH}_2\text{-(SrH}_2\text{-MgF}_2\text{)@Gr}$  (After 15 cycle of rehydrogenation).
